# Supplementary material
Source: publisher figshare collection journal article supplement (https://karger.figshare.com/ndownloader/files/35966321)
Supplement: Supplementary file 1 [file 35966321]

**Table S1a: Primer sequences for molecular cloning.**

| **Primer names** | **Primer sequences** | | **Restriction enzyme** | |
| --- | --- | --- | --- | --- |
| PcDNA3.1-core | | Forward: GCTGGATATCTGCAGAAATGAGCACAAATCCTAAACC | | EcoRI |
| Reverse: TTTTGTTCGGGCCCAAGAGCGGAGACCGGGGTGG | | HindIII |
| PcDNA3.1-E1 | | Forward: GCTGGATATCTGCAGAAATGGCCGAAGTGAAGAACATCAG | | EcoRI |
| Reverse: TTTTGTTCGGGCCCAAGCGCGTCCACCCCGGCGG | | HindIII |
| PcDNA3.1-E2 | | Forward: GCTGGATATCTGCAGAAATGCGCACCCATACTGTTGGGGG | | EcoRI |
| Reverse: TTTTGTTCGGGCCCAAGTGCTTCGGCCTGGCCCA | | HindIII |
| PcDNA3.1-p7 | | Forward: GCTGGATATCTGCAGAAATGGCACTAGAGAAGCTGGTCAT | | EcoRI |
| Reverse: TTTTGTTCGGGCCCAAGAGCATAAGCCTGTTGGGG | | HindIII |
| PcDNA3.1-NS2 | | Forward: GCTGGATATCTGCAGAAATGTATGACGCATCTGTGCATGG | | EcoRI |
| Reverse: TTTTGTTCGGGCCCAAGGAGAAGACTCCACCCCTTGG | | HindIII |
| PcDNA3.1-NS3 | | Forward: GCTGGATATCTGCAGAAATGGCTCCCATCACTGCTTATGC | | EcoRI |
| Reverse: TTTTGTTCGGGCCCAAGGGTCATGACCTCAAGGTCAG | | HindIII |
| PcDNA3.1-NS4a | | Forward: GCTGGATATCTGCAGAAATGAGCACGTGGGTCCTAGC | | EcoRI |
| Reverse: TTTTGTTCGGGCCCAAGGCATTCCTCCATCTCATCAAAAG | | HindIII |
| PcDNA3.1-NS4b | | Forward: GCTGGATATCTGCAGAAATGGCCTCTAGGGCGGCTCT | | EcoRI |
| Reverse: TTTTGTTCGGGCCCAAG GCATGGGATGGGGCAGTC | | HindIII |
| PcDNA3.1-NS5a | | Forward: GCTGGATATCTGCAGAAATGTCCGGATCCTGGCTCCG | | EcoRI |
| Reverse: TTTTGTTCGGGCCCAAGGCAGCACACGGTGGTATC | | HindIII |
| PcDNA3.1-NS5b | | Forward: GCTGGATATCTGCAGAAATGTCCATGTCATACTCCTGGAC | | EcoRI |
| Reverse: TTTTGTTCGGGCCCAAGCCGAGCGGGGAGTAGGA | | HindIII |
| pcDNA3.1-p53 | | Forward: CCGCTCGAGATGGAGGAGCCGCAGTCAGA | | XhoI |
| Reverse: CCGCTCGAGATGGAGGAGCCGCAGTCAGA | | EcoRI |

**Table S1b: Primer sequences for qRT-PCR.**

| **Primer names** | **Primer sequences** |
| --- | --- |
| UBD | Forward: GAGAAGCCTCTCATCTTACGGC |
| Reverse: TTGTGCCACTGAGCTGGACCTT |
| AKR1B10 | Forward: GAGGACCTGTTCATCGTCAGCA |
| Reverse: CGTCCAGATAGCTCAGCTTCAG |
| CXCL 10 | Forward: GGTGAGAAGAGATGTCTGAATCC |
| Reverse: GTCCATCCTTGGAAGCACTGCA |
| TMEM45B | Forward: GACCAGAAGGATGATGCCAACC |
| Reverse: CCGTGTCTCTTCATCCGAGTCA |
| KRT23 | Forward: GGTGACATCCACGAACTGAAGC |
| Reverse: AGCTTGCAGGAGTACCGAGACT |
| SCGN | Forward: GCCTCTAAAGATGGTCGCATTCG |
| Reverse: AAACTCCACGCTGCTGTCCAGT |
| SPINK1 | Forward: ATGACCCTGTCTGTGGGACTGA |
| Reverse: GCGGTGACCTGATGGGATTTCA |
| GPC3 | Forward: CATTGGAGGCTCTGGTGATGGA |
| Reverse: TTGTCCTTCGGAGTTGCCTGCT |
| MMP9 | Forward: GCCACTACTGTGCCTTTGAGTC |
| Reverse: CCCTCAGAGAATCGCCAGTACT |
| ISG15 | Forward: CTCTGAGCATCCTGGTGAGGAA |
| Reverse: AAGGTCAGCCAGAACAGGTCGT |
| SPP1 | Forward: CGAGGTGATAGTGTGGTTTATGG |
| Reverse: GCACCATTCAACTCCTCGCTTTC |
| MUC13 | Forward: TGGCTGTAACCAGACTGCGGAT |
| Reverse: GCATCAGGACACTTGAGACTGG |
